1 Different coexistence patterns between apex carnivores and mesocarnivores  
2 based on temporal, spatial, and dietary niche partitioning analysis in Qilian  
3 Mountain National Park, China

4

5 Wei Cong<sup>a</sup>, Jia Li<sup>b</sup>, Charlotte Hacker<sup>c</sup>, Ye Li<sup>a</sup>, Yu Zhang<sup>a</sup>, Lixiao Jin<sup>a</sup>, Yi Zhang<sup>a</sup>, Diqiang Li<sup>a</sup>, Yadong  
6 Xue<sup>a\*</sup>, Yuguang Zhang<sup>a\*</sup>

7

8 a. Ecology and Nature Conservation Institute, Chinese Academy of Forestry, Key Laboratory of  
9 Biodiversity Conservation, State Forestry and Grassland Administration, Beijing 100091, China

10 b. Institute of Ecological Conservation and Restoration, Chinese Academy of Forestry, Beijing, 100091,  
11 China

12 c. Department of Biological Sciences, Duquesne University, Pittsburgh, PA, 15282, USA

13

14 Wei Cong, 779237048@qq.com

15 Jia Li, lijia2530@126.com

16 Charlotte Hacker, charlotte.hacker00@gmail.com

17 Ye Li, liye19821012@sina.com

18 Yu Zhang: yuzhang420@126.com

19 Lixiao Jin: 2507476267@qq.com

20 Yi Zhang: 527808577@qq.com

21 Diqiang Li: lidq@caf.ac.cn

22 \*Correspondence:

23 Yadong Xue, xueyadong334@163.com;

24 Yuguang Zhang, yugzhang@sina.com.cn

25

26 **Abstract**

27 Carnivores play key roles in maintaining ecosystem structure and function as well as ecological processes,  
28 understanding how sympatric species coexistence mechanism in natural ecosystems is a central research  
29 topic in community ecology and biodiversity conservation. In this study, we explored intra- and  
30 interspecific niche partitioning along spatial, temporal, and dietary niche partitioning between apex  
31 carnivores (wolf *Canis lupus*, snow leopard *Panthera uncia*, Eurasian lynx *Lynx lynx*) and  
32 mesocarnivores (Pallas's cat *Otocolobus manul*, red fox *Vulpes vulpes*, Tibetan fox *Vulpes ferrilata*) in  
33 the Qilian Mountain national park of China using camera trapping data and DNA metabarcoding  
34 sequencing data. Our study showed that apex carnivore species had more overlap temporally (the value of  
35 time overlap from 0.661 to 0.900) or trophically (the value of diet overlap from 0.458 to 0.892),  
36 mesocarnivore species had high dietary overlap with each other (the value of diet overlap from 0.945 to  
37 0.997), and apex carnivore and mesocarnivore species had high temporal overlap (the value of time  
38 overlap from 0.497 to 0.855). Large dietary overlap was observed between wolf and snow leopard  
39 (Pianka's index=0.892) and Pallas's cat and Tibetan fox (Pianka's index=0.997) and suggesting increased  
40 resource competition for these pair species were existed. We conclude that spatial niche partitioning  
41 playing a key role in facilitating the coexistence of apex carnivore species, spatial and temporal niche  
42 partitioning facilitate the coexistence of mesocarnivore species, and spatial and dietary niche partitioning  
43 facilitate the coexistence between apex and mesocarnivore species. Our findings address, for the first  
44 time, niche partitioning was considered across temporal, spatial and dietary dimensions and diverse  
45 coexistence patterns of carnivore species were presented in the Qilian Mountain national park of China.  
46 These finding will contribute substantially to current understanding of carnivore guilds and effective  
47 conservation management in fragile alpine ecosystems.  
48

## 49 **Introduction**

50 Carnivores play key roles in maintaining ecosystem structure and function, as well as ecological  
51 processes (Ripple et al., 2014). They are classically specialized hunters occupying top trophic positions  
52 that work to suppress the number of herbivores and other carnivores through predation, competition and  
53 trophic cascades (Ripple et al., 2014; Newsome et al., 2017; Ritchie and Johnson, 2009). Understanding  
54 how sympatric species coexist in natural ecosystems is a central research topic in community ecology and  
55 biodiversity conservation (Chu et al., 2017). Previous studies on carnivore niche partitioning, interspecies  
56 interactions, and food web structure covering all the three dimensions are scarce due to limitations in  
57 research methodology and scale (Cusack et al., 2017; Dröge et al., 2017). This has severely limited the  
58 theoretical and practical understanding of carnivore competition and coexistence. Overgrazing, human  
59 disturbance and climate change have resulted in habitat degradation and the decline of carnivore  
60 populations (Li et al., 2021; Manlick and Pauli, 2020; Ripple et al., 2014), which could affect  
61 interspecific interactions. The strategies adopted by carnivores to alleviate increasingly fierce  
62 interspecific competition and coexistence has become a hot topic in animal ecology.

63 The competitive exclusion principle dictates that species with similar ecological requirements are  
64 unable to successfully coexist (Hardin, 1960; Gause, 1934). Instead, competitors must adapt to avoid or  
65 reduce resource overlap, a process called niche partitioning. Niche partitioning can occur along spatial,  
66 temporal, and trophic dimensions (Schoener, 1974). Spatial niche partitioning reflects the habitat  
67 preference of animals. Habitats with high spatial heterogeneity provide various habitat types, which could  
68 meet the varying needs of carnivore species to promote coexistence (Garrote and Pérez de Ayala, 2019).  
69 Carnivores may deposit scat, urine, or other chemosensory or visual signals to inform competitors of their  
70 presence in an effort to alter their use of the same space, and may even take action in the form of  
71 intimidation and death (Haswell et al., 2018). The spatial relationships of carnivores are altered in  
72 response to topography, habitat quality, prey availability, and human activity (Liu et al., 2021;  
73 Monterroso et al., 2020; Sévêque et al., 2020; Marneweck et al., 2019). For example, grazing activity  
74 compresses the living space of carnivores and intensifies use of suboptimal habitats. In addition, the  
75 presence of livestock in suboptimal habitat provides a choice between predation benefit and risk,  
76 breaking the original spatial dimension being used by species within the carnivore guild and possibly  
77 increasing competition (Filazzola et al., 2020). Temporal niche partitioning refers to the temporal  
78 differences in animal activity rhythms that relieve competitive pressure, and is characterized by high  
79 levels of elasticity and flexibility (Qi et al., 2021; Vilella et al., 2020). However, studies on the temporal  
80 rhythms of carnivores have been hampered by limitations in technology and their generally cryptic  
81 behavior. Trophic, or dietary, niche partitioning refers to the varied use of food resources by species.  
82 Trophic niche partitioning can effectively alleviate competition among carnivores, but is easily  
83 influenced by prey richness (Steinmetz et al., 2021), interspecific competition (Donadio and Buskirk,  
84 2006), and body mass (Lanszki et al., 2019). For example, carnivores may specialize on a narrow breadth  
85 of energetically profitable prey in prey rich areas, resulting in reduced competition (Steinmetz et al.,  
86 2021). In contrast, carnivores in prey poor areas may consume more numerous but low-reward smaller  
87 prey, thus becoming more generalist and potentially leading to more competition (Steinmetz et al., 2021;  
88 Pokhral and Wegge, 2018). At present, many studies have focused on the interspecific relationships of  
89 sympatric carnivores within a single dimension (Hacker et al., 2022; Alexander et al., 2016; Anwar et al.,  
90 2011), which prohibits comprehensive understanding of the mechanisms that allow carnivore

91 coexistence.

92 In more recent years, new research methods making it possible to study apex carnivores and  
93 mesocarnivores have been developed. Camera trapping has become a helpful tool for accumulating large  
94 amounts of time-recorded data, and is widely used to investigate species coexistence (Frey et al., 2017).  
95 For example, Li et al. (Li et al., 2019) used camera trap data to conclude that temporal segregation is a  
96 key mechanism for promoting the coexistence of tigers (*Panthera tigris*) and leopards (*P. pardus*). DNA  
97 metabarcoding provides a noninvasive molecular tool of greater ease and accuracy than traditional  
98 dietary discernment methods and has overcome many of the limitations surrounding inaccurate and low  
99 taxonomic resolution (Deiner et al., 2017; Newmaster et al., 2013). This technology has been applied  
100 across numerous taxa, including invertebrates, herbivores and carnivores, and has offered profound  
101 insight into the ecology, conservation and biological monitoring of at-risk species (Deagle et al., 2019;  
102 Kartzinel et al., 2015). For example, Shao et al. (Shao et al., 2021) found that dietary niche partitioning  
103 promoted the coexistence of species in the mountains of southwestern China based on DNA  
104 metabarcoding.

105 Qilian Mountain is a biodiversity hotspot with one of the richest carnivore assemblages in China.  
106 China's pilot program aimed at creating nature reserves and a national park system has amplified species  
107 protection, ultimately improving species diversity and the ecosystems they inhabit. However, this  
108 restoration has increased competition between carnivores. In conjunction, climate change, human  
109 activities and overgrazing continue to alter habitat and add a layer of complexity to conservation decision  
110 making and bring great challenges to the coexistence of species (Li et al., 2021; Sévêque et al., 2020;  
111 Filazzola et al., 2020). However, few studies have documented the temporal, spatial and dietary  
112 dimensions of partitioning for intra- and interspecific niches between apex carnivores and  
113 mesocarnivores in the Qilian Mountains.

114 Here, we explored the habitat preference, activity rhythm, and prey item composition of a sympatric  
115 carnivore guild in an attempt to reveal interspecific relationships and mechanisms of niche partitioning  
116 along the axes of space, time and diet across the Qilian Mountain national park using camera trap data and  
117 DNA metabarcoding data. The main objectives of this study were: 1) to explain the spatial distribution  
118 patterns among sympatric carnivore species; 2) to elucidate daily activity patterns among sympatric  
119 carnivore species; 3) to examine dietary composition, diversity and similarity among sympatric carnivore  
120 species; and 4) to analyze species coexistence patterns based on temporal, spatial and dietary dimensions  
121 among sympatric carnivore species.

## 122 **Results**

### 123 ***Sympatric carnivore identification***

124 Of the 480 scat samples sequenced, those which had no sequencing data, were inconclusive,  
125 consisted of non-target species, or host species with low sample sizes (1 Asian badger (*Meles leucurus*)  
126 and 4 upland buzzard (*Buteo hemilasius*)) were removed (Figure S1). The remaining 404 scat samples  
127 were composed of three apex carnivores (49 wolf, 147 snow leopard, 19 Eurasian lynx) and three  
128 mesocarnivores (63 Pallas's cat, 87 red fox, 39 Tibetan fox).

### 129 ***Spatial distribution difference and overlap***

130 A total of 322 camera trap sites were surveyed, of which 3 cameras were failed due to loss. We  
131 analyzed data from 319 camera sites and obtained 14,316 independent detections. We recorded wolf in 26  
132 sites, snow leopard in 109 sites, Eurasian lynx in 36 sites, red fox in 92 sites, and Tibetan fox in 34 sites.

133 To analysis the spatial distribution and overlap, we performed occupancy models to estimate carnivores'  
134 occupancy and detection probability by 43 models of each species. Snow leopard had a higher occupancy  
135 probability than other carnivore species with the occupancy probability estimated as 0.423 (Table 1).  
136 Eurasian lynx had a lower occupancy probability with the estimated as 0.155. Spatial projection showed  
137 that occupancy probability of wolf and Eurasian lynx were higher in western of the study area, red fox  
138 and Tibetan fox were higher in north-western and southern portion of the study area, and snow leopard  
139 was higher throughout the study area (Figure 2). However, the camera detection rates of Pallas's cat were  
140 too low to analyze the occupancy model and daily activity patterns.

141 Wolf and Eurasian lynx occupancy probability declined with increasing NDVI and roughness index  
142 (Table 2, Figure 3). Wolf exhibited the strongest relationship between occupancy probability and  
143 roughness index. Tibetan fox occupancy probability increased with increasing elevation and distance to  
144 road. Snow leopard and red fox exhibited no strong relationships between occupancy probability and  
145 variables. Detection probability was highest for snow leopard ( $Pr = 0.428$ , Table 1) and lowest for wolf  
146 ( $Pr = 0.117$ ). Elevation had a positive relationship with detection probability of wolf, snow leopard, red  
147 fox and Tibetan fox. Prey had a positive relationship with the detection probability of Eurasian lynx and  
148 Tibetan fox (Table 2).

149 The Sørensen similarity index (S) ranged from 0.1 to 0.5 (Table 3). Compared with other  
150 combinations of apex-mesocarnivore pairs, snow leopard and red fox ( $S=0.477$ ) had relatively high  
151 spatial overlap, while Eurasian lynx and Tibetan fox ( $S=0.198$ ) had the lowest spatial overlap. Moreover,  
152 spatial overlap of apex versus apex carnivores and mesocarnivores versus mesocarnivores was relatively  
153 low.

#### 154 ***Daily activity patterns and differences***

155 A total of 1444 independent records were obtained for five carnivore species, consisting of 79  
156 records of wolf, 458 records of snow leopard, 126 records of Eurasian lynx, 421 records of red fox, and  
157 359 records of Tibetan fox. Among apex carnivores (Table 3, Figure S2), the daily activity was similar  
158 between snow leopard and Eurasian lynx and their diel activity overlap was close to 1 ( $\Delta_4=0.900$ ,  
159  $P=0.285$ ), their daily activity peak was at 21:00 hr and dawn. However, the wolf had a significantly  
160 different daily activity pattern with snow leopard ( $\Delta_4=0.676$ ,  $P<0.001$ ) and Eurasian lynx ( $\Delta_4=0.661$ ,  
161  $P<0.001$ ), and its daily activity peaked happened around 9:00 and 18:00 hr. Tibetan fox and red fox had  
162 different activity patterns and peaks ( $P<0.001$ ). The activity peak for red fox activity peaked at 3:00 and  
163 21:00 hr, while the Tibetan fox had a prolonged active bout between noon and dusk. Temporal activity  
164 patterns between apex carnivores and mesocarnivores were significantly different, except for wolf and  
165 Tibetan fox ( $\Delta_4=855$ ,  $P=0.118$ ).

#### 166 ***Dietary composition, diversity and similarity***

167 A total of 26 unique prey species were identified from 9 taxonomic orders (Figure 4, Table S1).  
168 Artiodactyla and lagomorpha were the most frequently detected in the diets of apex carnivores and  
169 mesocarnivores, accounting for 32.81% and 70.18% of prey counts, respectively. Blue sheep made up  
170 26.50% of prey counts in apex carnivore diet, while plateau pika made up 67.11% of prey counts in  
171 mesocarnivore diet. Livestock were present in 17.98% of apex carnivore diet counts and were present in

172 4.82% mesocarnivore diet counts.

173 The dietary niche overlap among all carnivore species can be found in Table 3. Wolf and snow  
174 leopard had the highest dietary niche overlap value among apex carnivores ( $O_{jk}=0.892$ ). The value of  
175 Pianka's index was generally low between apex carnivores and mesocarnivores, except wolf and red fox  
176 ( $O_{jk}=0.811$ ). In contrast, observed dietary overlap was greatest among the mesocarnivores, especially  
177 Pallas's cat and Tibetan fox, with a value of 0.997.

178 Red fox had the greatest richness of prey with a value of 16, while Pallas's cat and Tibetan fox had  
179 the lowest diversity of prey with richness value of 6 (Table S2). Dietary similarity was assessed using  
180 inversed Jaccard's Coefficients (Jaccard's Distances, Table S3). Diets were most similar between wolf  
181 and snow leopard with a value of 0.588 and least similar between Pallas's cat and Tibetan fox with a  
182 value of 0.200. All other pairs fell between the values of 0.2 and 0.5.

### 183 **Discussion**

184 Our study addresses, for the first time, the coexistence patterns of carnivore species present on  
185 Qilian Mountain national park across multiple niche partitioning. This work substantially contributes to  
186 current understanding of carnivore guilds and offers helpful information for biodiversity conservation at  
187 the regional scale. Moreover, our study provides important insights into the protentional mechanisms of  
188 niche partitioning among sympatric carnivores, particularly intra- and interspecific relations between  
189 apex carnivores and mesocarnivores. Specifically, we found that the overall trend of spatial overlap  
190 across carnivores is relatively low, that apex carnivores overlap in time and diet, that mesocarnivores  
191 showed a high degree of dietary overlap, and that there was substantial similarity in diel activity patterns  
192 between apex carnivores and mesocarnivores. These results suggest that carnivores with similar  
193 ecological traits foster co-occurrence by adjusting their daily activity patterns and using differing food  
194 resources to minimize competitive interactions.

195 We found dietary and temporal overlap among apex carnivores, suggesting that spatial partitioning  
196 is responsible for their successful coexistence in this area. Wolf and snow leopard had the highest dietary  
197 overlap and prey similarity between apex carnivore pairs in our case, showing that the avoidance of space  
198 and time plays an important role in their coexistence. Recent evidence suggests that habitat preference  
199 facilitates the coexistence of wolf and snow leopard (Shrotriya et al., 2022). Their hunting strategies may  
200 be impacted their habitat selection. Solitary snow leopards are more suitable for hiding in habitats  
201 features as ambush predators, while wolves hunt in packs (Shrotriya et al., 2022). It is clear that wild  
202 ungulates (e.g., blue sheep) constituted the primary proportion of wolf and snow leopard diet, followed  
203 by small mammals such as plateau pika, Himalayan marmot (*Marmota himalayana*), and woolly hare  
204 (*Lepus oiostolus*). In addition, livestock consumption also contributed to the high degree of overlap in  
205 their diets (Wang et al., 2014). This supports the optimal foraging theory, in which large predators  
206 preferentially select food resources that provide maximum benefit (Brown et al., 1999), but also showed  
207 that greater competition for resources is likely to occur between wolf and snow leopard due to their use of  
208 the same prey species in this area. This may be especially true in times of habitat stress when resources  
209 are poor. Snow leopard and Eurasian lynx had the highest temporal overlap between apex carnivore pairs  
210 in our case, suggest that spatial and dietary partitioning may facilitate the coexistence. The Eurasian lynx  
211 is considered an opportunistic predator, and its prey varies among different regions with its primary  
212 dietary resource being ungulates and small mammals. For example, Eurasian lynx showed a strong  
213 preference for brown hare *L. europaeus* in Turkey, edible dormice *Glis glis* in Slovenia and Croatia, and

214 chamois *Rupicapra rupicapra* or roe deer *Capreolus capreolus* in Switzerland (Mengülluöglu et al., 2018;  
215 Krofel et al., 2011; Molinari-Jobin et al., 2007). Varied prey selection may be related to sex, age,  
216 population density and season (Mengülluöglu et al., 2018; Odden et al., 2006). Our results show that  
217 woolly hare make up the majority of the Eurasian lynx diet, followed by blue sheep. Woolly hare is  
218 mainly distributed in shrubland, meadow, desert and wetland, while blue sheep tend to choose highly  
219 sheltered areas, close to bare rocks and cliffs as habitat. Prey preferences between snow leopard and  
220 Eurasian lynx also contributes to spatial avoidance.

221 Mesocarnivores showed substantial overlap in diet, indicating that food resources may be a major  
222 competitive factor, making spatial and temporal partitioning the key mechanisms driving successful  
223 coexistence. This is in alignment with previous studies showing that mesocarnivores use temporal and  
224 spatial segregation to reduce competition and the probability of antagonistic interspecific  
225 encounters (Ferreiro-Arias et al., 2021; Li et al., 2022a). The differences in habitat preference may lead to  
226 spatial niche partitioning among mesocarnivores (Wang et al., 2022). In addition, species can adjust  
227 temporal periods of behavior to respond to environmental change, competition, and predation risk (Gallo  
228 et al., 2022; Finnegan et al., 2021; van der Vinne et al., 2019). Pallas's cat is a diurnal hunter and inhabits  
229 montane grassland, shrub steppe and cold montane deserts (Ross et al., 2019). Red fox is mainly  
230 nocturnal and is widely distributed across various habitats (Reshamwala et al., 2022; Pandolfi et al.,  
231 1997), with the habitat type dependent on the abundance of prey (Gołdyn et al., 2003). Tibetan fox is a  
232 diurnal hunter of the Tibetan plateau and inhabits shrub meadow, meadow steppe and alpine meadow  
233 steppe (Gong and Hu, 2003). It is worth noting the substantial overlap in diet between Pallas's cat and  
234 Tibetan fox. The dietary overlap between the two was extremely high, with a Pianka's value close to 1.  
235 Dietary analyses showed that pika contributed to more than 85% of their collective diets, with 90% of  
236 Pallas's cat diet being pika. Pika may be an optimal prey item in the area because of size and year-round  
237 activity (Ross, 2009). Previous studies have shown that the Pallas's cat and Tibetan fox are specialist  
238 predators of pikas (Harris et al., 2014; Ross, 2009). However, specialization on pika is facultative in that  
239 Pallas's cat and Tibetan fox can select other prey items when pika availability is low (Harris et al., 2014;  
240 Ross, 2009). This was observed in our study, even though dietary diversity was low.

241 Apex carnivores and mesocarnivores showed substantial overlap in time overall, indicating that  
242 spatial and dietary partitioning may play a large role in facilitating their coexistence. As confirmed by  
243 previous research, kit foxes (*V. macrotis*) successfully coexisted with dominant carnivores by a  
244 combination of spatial avoidance and alternative resources (Lonsinger et al., 2017). The differences of  
245 body mass may play a crucial role in minimizing dietary overlap, effectively reducing interspecific  
246 competition between apex and mesocarnivores. Of exception in our study, however, was wolf and red fox,  
247 who exhibited more dietary overlap, indicating that temporal and spatial avoidance may promote their  
248 coexistence. As canid generalist-opportunist species, the wolf and red fox consumed similar prey, albeit  
249 the red fox may have obtained livestock and ungulate species via scavenging or by preying on very  
250 young individuals (Hacker et al., 2022). Recent research has found that the red fox may coexist with the  
251 wolf by exploiting a broader niche (Shrotriya et al., 2022). This was confirmed by occupancy model in  
252 our study, where significant differences in the relationship with NDVI between wolf and red fox were  
253 observed.

254 Several restrictions remain for this research. The first limitation involves differences in samples  
255 sizes. Although the scat samples of Tibetan fox were relatively low, the accuracy of DNA metabarcoding



256 in informing species presence in diet ensures that data are informative and thus still important for species  
257 conservation management decisions(Hacker et al., 2022). Second, the methodology of foraging (e.g.,  
258 predation or scavenging) and the condition of prey item (e.g., age or size) cannot be identified in dietary  
259 studies (Hacker et al., 2022). Pika is a prime component of diet among mesocarnivores, especially in the  
260 diet of the Pallas's cat and the Tibetan fox. We surmise that the simultaneous dependence on pika led to  
261 partial overlap in spatial and activity patterns, resulting in increased potential competitive interactions.  
262 Due to the lack of spatial and temporal analysis of Pallas's cat in our study, further monitoring is needed  
263 to develop a comprehensive conservation plan. Despite these limitations, our study provides a foundation  
264 from which future studies interested in niche partitioning among carnivores along spatial, temporal, and  
265 dietary dimensions, can be modeled.

266 In summary, our study has shown that the coexistence of carnivore species in the landscapes of the  
267 Qilian Mountain national park can be facilitated along three niche axes, with spatial segregation being  
268 relatively pronounced. Apex carnivore species tended to overlap temporally or trophically, mesocarnivore  
269 species had high dietary overlap with each other, and apex carnivore and mesocarnivore species  
270 displayed similarity in time. Pika, blue sheep and livestock were found to make up a large proportion of  
271 carnivore diet. The resource competition between wolf and snow leopard and the interspecific  
272 competition between Pallas's cat and Tibetan fox were strong in this area. Based on the results presented  
273 above, we propose that further protection and management work should be undertaken in the following  
274 areas. First, greater efforts are needed to protect habitat. For example, the development of habitat  
275 corridors and optimization of grassland fence layouts could be prioritized to protect migration passage  
276 routes. Second, resource competition should be carefully monitored between snow leopards and wolves,  
277 and between Pallas's cat and Tibetan foxes. More attention is needed for pika at our study site  
278 considering the role they play in the conservation of Pallas's cat and Tibetan fox populations. Campaign  
279 of pika poisoning was previously implemented because of concerns that pika could cause grassland  
280 degradation (Smith and Foggin, 1999). Recent research shows that the health of pika population and their  
281 habitat are the most important factor for Pallas's cat's distribution (Greenspan and Giordano, 2021).  
282 Further, it is necessary to be alert to the preponderance of smaller prey in predator diets, as this may  
283 indicate severe loss of larger prey, which will increase the risk of interference competition(Steinmetz et  
284 al., 2021). Third, focusing on the recovery of wild prey, strengthening the management of grazing areas,  
285 and ensuring herder livelihoods will be crucial to reduce livestock predation events that may trigger  
286 human-carnivore conflicts. It is necessary that daily patrols of protected areas and primary habitat spaces  
287 occur and that educational presentations are given to conservation staff and herders. This could include  
288 education surrounding environmental policy and laws, nature ecology, how to set up camera trapping and  
289 methods of field investigation, so that herdsman can play a more important role in the protection of  
290 carnivores. Our study corroborates and complements the findings of prior studies on these species and  
291 their coexistence mechanisms, and also has implications for wildlife conservation in the area.

## 292 **Material and methods**

### 293 *Study sites*

294 The Qilian Mountains laterally span Gansu and Qinghai Provinces in China, located in the  
295 northeastern edge of the Qinghai-Tibetan Plateau (Figure 1). The Qilian Mountains National Park covers  
296 an area of approximately 52,000 km<sup>2</sup>, with an average elevation of over 3000 m. The area is an alpine



297 ecosystem with a typical plateau continental climate. The average annual temperature is below  $-4^{\circ}\text{C}$  and  
298 the average annual rainfall is about 400 mm, with habitats mainly consisting of deserts, grassland,  
299 meadows, and wetland (Zheng, 2011). Wildlife present include the wolf (*Canis lupus*), snow leopard (*P.*  
300 *uncia*), Eurasian lynx (*Lynx lynx*), red fox (*Vulpes vulpes*), Tibetan fox (*V. ferrilata*), Tibetan brown bear  
301 (*Ursus arctos*), Chinese mountain cat (*Felis bieti*), wild yak (*Bos mutus*), blue sheep (*Pseudois nayaur*),  
302 alpine musk-deer (*Moschus chrysogaster*), Tibetan antelope (*Pantholops hodgsonii*), Himalayan marmot  
303 (*Marmota himalayana*), woolly hare (*Lepus oiostolus*), and plateau pika (*Ochotona curzoniae*), among  
304 others (Ma et al., 2021; Xue et al., 2019).

### 305 **Camera-trap monitoring and non-invasive sampling**

306 The study area was subdivided into sample squares of  $25\text{ km}^2$  ( $5\times 5\text{ km}$ ) as a geographical reference  
307 for placing camera survey sites and collecting scat samples (Xue et al., 2019). Species occurrence was  
308 recorded using camera-trap monitoring (Ltl-6210; Shenzhen Ltl Acorn Electronics Co. Ltd). Two camera  
309 traps were placed in each square with a distance of at least 1 km between them. However, due to  
310 limitations of terrain, landform, road accessibility and other factors, the number of camera sites in some  
311 squares was adjusted in accordance to field conditions. Camera traps were set in areas believed to be  
312 important to and heavily used by wildlife, such as the bottoms of cliffs, sides of boulders, valleys and  
313 ridges along movement corridors. We placed a total of 280 cameras and each camera worked for 4 to 6  
314 months and considered whether to relocate to another position based on the detections of animals. The  
315 camera trap was set to record the time and date on a 24 hr clock when triggered, and to record a 15s video  
316 and 1 photo with an interval of 2 minutes between any two consecutive triggers. Carnivores were  
317 monitored from December 2016 to February 2022 (Figure 1).

318 Non-invasive sampling of scats believed to be of carnivore origin were collected within camera  
319 trapping areas. A small portion of scat (approximately 1/3) was broken off and stored in a 15 ml  
320 centrifuge tubes with silica desiccant covered by clean filter paper to separate the desiccant from the scat  
321 (Janecka et al., 2008). Gloves were replaced between sampling to avoid cross-contamination. Sampling  
322 place, date, and sample number were labeled on the tube; GPS coordinates, elevation, and nearby  
323 landscape features were recorded on the sample collection sheet (Hacker et al., 2021). A total 480 scat  
324 samples were collected from April 2019 to June 2021 (Figure 1).

### 325 **Data Analysis**

#### 326 **Spatial analysis**

327 All pictures captured by the camera traps without animals or people were removed. Only photos or  
328 videos of the same species taken at intervals of 30 min were considered as an effective shot to ensure  
329 capture independence (Li et al., 2020). To investigate the spatial distribution of carnivores, as well as the  
330 influence of environmental factors on the site occupancy of species in the study area, we performed  
331 occupancy models to estimate carnivores' occupancy ( $\psi$ ) and detection ( $Pr$ ) probability (Li et al., 2022b;  
332 Moreno-Sosa et al., 2022). We created the matrix that each carnivore species was detected (1) or not (0)  
333 during each 30-days (that is 0-30, 31-60, 61-90, 91-120, 121-150, >150 days) for each camera location.  
334 Based on the previous studies of habitat selection of carnivores (Greenspan and Giordano, 2021;  
335 Alexander et al., 2016), we assessed elevation (ele), normalized difference vegetation index (ndvi),  
336 distance to roads (disrd) and roughness index (rix) as variables in the occupancy models. In addition, we  
337 used elevation and prey (the number of independent photos of their preferred prey based on dietary

338 analysis in this study; wolf and snow leopard: artiodactyla including livestock, Eurasian lynx and Pallas's  
339 cat: lagomorpha, red fox and Tibetan fox: lagomorpha and rodentia) as covariates that affects the  
340 detection rate. Here, we used 43 models to estimate species distribution. Road data was obtained from  
341 Open Street Map (OSM, <https://www.openstreetmap.org>). Others environment data were obtained from  
342 the Resource and Environment Science and Data Center (<https://www.resdc.cn>). We fitted all possible  
343 combinations of covariates by logit link function. We used Akaike's information criterion (AIC) to rank  
344 candidate models, and selected  $\Delta AIC \leq 2$  model as the optimal model. If there are more than one optimal  
345 model, the covariate estimates are obtained by using the equal-weight average.

346 Carnivore co-occurrence was evaluated using the Sørensen similarity index (value = 0, indicating  
347 maximum segregation and value = 1, indicating maximum co-occurrence) based on binary presence  
348 absence data within the 5 km  $\times$  5 km camera trap grid (Torretta et al., 2021; Sorensen, 1948). Spatial  
349 analyses were performed using ArcGIS 10.8 (ESRI Inc.) and the "vegan" packages (Oksanen et al., 2019)  
350 and "unmarked" package (Fiske and Chandler, 2011) for R studio (version 1.1.463).

351 Temporal analysis

352 Estimates of the coefficient of overlap ( $\Delta$ ) for activity patterns were estimated using the  
353 non-parametric kernel density method and applying the time data obtained by the camera traps. Because  
354 the smallest sample had more than 50 records, we used the  $\Delta_4$  estimator for pairwise comparisons  
355 between carnivore activity patterns, and used a smooth bootstrap scheme to generate 1000 resamples with  
356 95% confidence intervals to test the reliability of the overlap value (Ridout and Linkie, 2009). Activity  
357 pattern analyses were performed using the "overlap" R packages. Values of the  $\Delta_4$  estimates were  
358 calculated relative to 1000 simulated null models of randomized overlap data using the 'compareCkern'  
359 function in the "activity" R package to test for differences in daily activity patterns (Ridout and Linkie,  
360 2009; Rowcliffe et al., 2014).

361 Species identification and dietary analysis

362 Host species and diet were identified using metabarcoding. DNA was extracted using the QIAamp  
363 Fast DNA Stool Mini Kit (QIAGEN, Germany) following standard protocols and the MT-RNR1 (12S)  
364 and COX1 (cytochrome c oxidase subunit I) gene segments amplified using 12SV5-F/R primer and  
365 COX1 primers, respectively (Hacker et al., 2021; Riaz et al., 2011). PCR reaction conditions followed the  
366 methods described in Hacker et al. (Hacker et al., 2021). The resulting library was sequenced on an  
367 Illumina NovaSeq platform and 250 bp paired-end reads were generated (Guangdong Magigene  
368 Biotechnology Co., Ltd. Guangzhou, China).

369 We used CLC Genomics Workbench v12.0 (QIAGEN, Denmark) to determine the host species as  
370 well as the prey consumed by each carnivore by mapping sequence reads to reference sequences of  
371 possible prey downloaded from GenBank and BOLD (Barcode of Life Data Systems) with representative  
372 haplotypes compiled into one .fasta file. Raw reads were required to have at least 98% similarity across at  
373 least 90% of the reference sequence for mapping (Hacker et al., 2021). Species and prey identification  
374 were made based on the reference taxa with the highest number of reads mapped and the fewest  
375 mismatches. Samples in which species could not be identified were analyzed to ensure the reference file  
376 was not incomplete by using the *de novo* assembly tool in CLC, then blasting the resulting contig  
377 sequence with the nucleotide databases in NCBI (<https://blast.ncbi.nlm.nih.gov/Blast.cgi>). As an

378 additional precaution, the geographic range of the determined host and prey species was researched using  
379 the IUCN Red List (<https://www.iucnredlist.org/>) to ensure that it overlapped with the study site. For  
380 complete methods on data parameters and methods used, see Hacker et al. (Hacker et al., 2021).  
381 Dietary data were summarized by the frequency of occurrence of prey species in scats observed. The  
382 “bipartite” R package was used to construct food web networks (Dormann, 2011). Dietary diversity for  
383 each carnivore host species was assessed by calculating richness and Shannon’s Index (Shannon and  
384 Weaver, 1949). Interspecific dietary niche overlap was evaluated using Pianka’s Index ( $O_{jk}$ ) (value = 0,  
385 no dietary overlap and value = 1, complete dietary overlap) and 95% confidence intervals were obtained  
386 by bootstrapping with 1000 resamples via the “spaa” R package (Zhang, 2016). Dietary similarity  
387 between any two given carnivore species was assessed by calculating the inversed value of Jaccard’s Index  
388 based on binary presence absence data of prey.

### 389 **Acknowledgements**

390 We would like to thank Mr. Jiong He, Yayue Gao, Duifang Ma, Liji Wu, Dazhi Hu and other  
391 colleagues of Qilianshan National Park for their generous assistance in the field surveys. This work was  
392 supported by the National Natural Science Foundation of China (No. 32201430 and No. 32101409) and  
393 the Welfare Project of the National Scientific Research Institution (No. CAFYBB2019ZE003 and  
394 CAFYBB2018ZD001).

### 395 **Author contributions**

396 Wei Cong, Conceptualization, Formal analysis, Investigation, Methodology, Software, Validation,  
397 Visualization, Writing-original draft, Writing-review and editing; Jia Li, Conceptualization, Funding  
398 acquisition, Investigation, Methodology, Resources, Software, Writing-review and editing; Charlotte  
399 Hacker, Investigation, Methodology, Writing-review and editing; Ye Li, Investigation; Yu Zhang,  
400 Investigation, Funding acquisition; Lixiao Jin, Investigation; Yi Zhang, Investigation; Diqiang Li,  
401 Funding acquisition, Methodology, Resources, Supervision, Writing-review & editing; Yadong Xue,  
402 Investigation, Resources, Writing-review and editing; Yuguang Zhang, Conceptualization, Funding  
403 acquisition, Investigation, Methodology, Resources, Supervision, Writing-review and editing.

### 404 **Declaration of interests**

405 The authors declare no competing interests.

### 406 **References**

- 407 Alexander JS, Shi K, Tallents LA, Riordan P. 2016. On the high trail: examining determinants of site use  
408 by the Endangered snow leopard *Panthera uncia* in Qilianshan, China. *Oryx* **50**:231–238.  
409 doi:10.1017/S0030605315001027
- 410 Anwar M, Jackson R, Nadeem M, Janečka J, Hussain S, Beg M, Muhammad G, Qayyum M. 2011. Food  
411 habits of the snow leopard *Panthera uncia* (Schreber, 1775) in Baltistan, Northern Pakistan.  
412 *European Journal of Wildlife Research* **57**:1077–1083. doi:10.1007/s10344-011-0521-2
- 413 Brown JS, Laundré JW, Gurung M. 1999. The Ecology of Fear: Optimal Foraging, Game Theory, and  
414 Trophic Interactions. *Journal of Mammalogy* **80**:385–399. doi:10.2307/1383287
- 415 Chu C, Wang Y, Liu Y, Jiang L, He F. 2017. Advances in species coexistence theory. *Biodiversity Science*  
416 **25**:345–354. doi:10.17520/biods.2017034
- 417 Cusack JJ, Dickman AJ, Kalyahe M, Rowcliffe JM, Carbone C, Macdonald DW, Coulson T. 2017.  
418 Revealing kleptoparasitic and predatory tendencies in an African mammal community using  
419 camera traps: a comparison of spatiotemporal approaches. *Oikos* **126**:812–822.

- 420           doi:10.5061/dryad.br86d
- 421 Deagle BE, Thomas AC, McInnes JC, Clarke LJ, Vesterinen EJ, Clare EL, Kartzinel TR, Eveson JP. 2019.
- 422           Counting with DNA in metabarcoding studies: How should we convert sequence reads to dietary
- 423           data? *Mol Ecol* **28**:391–406. doi:10.1111/mec.14734
- 424 Deiner K, Bik HM, Mächler E, Seymour M, Lacoursière-Roussel A, Altermatt F, Creer S, Bista I, Lodge
- 425           DM, de Vere N, Pfrender ME, Bernatchez L. 2017. Environmental DNA metabarcoding:
- 426           Transforming how we survey animal and plant communities. *Mol Ecol* **26**:5872–5895.
- 427           doi:10.1111/mec.14350
- 428 Donadio E, Buskirk SW. 2006. Diet, morphology, and interspecific killing in carnivora. *Am Nat*
- 429           **167**:524–536. doi:10.1086/501033
- 430 Dormann CF. 2011. How to be a specialist? Quantifying specialisation in pollination networks. *Network*
- 431           *Biology* **1**:1–20.
- 432 Dröge E, Creel S, Becker MS, M’soka J. 2017. Spatial and temporal avoidance of risk within a large
- 433           carnivore guild. *Ecology and Evolution* **7**:189–199. doi:10.1002/ece3.2616
- 434 Ferreiro-Arias I, Isla J, Jordano P, Benítez-López A. 2021. Fine-scale coexistence between Mediterranean
- 435           mesocarnivores is mediated by spatial, temporal, and trophic resource partitioning. *Ecol Evol*
- 436           **11**:15520–15533. doi:10.1002/ece3.8077
- 437 Filazzola A, Brown C, Dettlaff M, Amgaa B, Grenke J, Bao T, Heida I, Cahill J. 2020. The effects of
- 438           livestock grazing on biodiversity are multi-trophic: a meta-analysis. *Ecology Letters*
- 439           **23**:1298–1309. doi:10.1111/ele.13527
- 440 Finnegan SP, Gantchoff MG, Hill JE, Silveira L, Tôrres NM, Jácomo AT, Uzal A. 2021. “When the felid’s
- 441           away, the mesocarnivores play”: seasonal temporal segregation in a neotropical carnivore guild.
- 442           *Mamm Biol* **101**:631–638. doi:10.1007/s42991-021-00110-9
- 443 Fiske I, Chandler R. 2011. unmarked: An R Package for Fitting Hierarchical Models of Wildlife
- 444           Occurrence and Abundance. *Journal of Statistical Software* **43**:1–23.
- 445 Frey S, Fisher J, Burton C, Volpe J. 2017. Investigating animal activity patterns and temporal niche
- 446           partitioning using camera trap data: Challenges and Opportunities. *Remote Sensing in Ecology*
- 447           *and Conservation* **3**. doi:10.1002/rse2.60
- 448 Gallo T, Fidino M, Gerber B, Ahlers A, Angstmann J, Amaya M, Concilio A, Drake D, Gay D, Lehrer E,
- 449           Murray M, Ryan T, St. Clair C, Salsbury C, Sander H, Stankowich T, Williamson J, Belaire J,
- 450           Simon K, Magle S. 2022. Mammals adjust diel activity across gradients of urbanization. *eLife* **11**.
- 451           doi:10.7554/eLife.74756
- 452 Garrote G, Pérez de Ayala R. 2019. Spatial segregation between Iberian lynx and other carnivores.
- 453           *Animal Biodiversity and Conservation* **42**. doi:10.32800/abc.2019.42.0347
- 454 Gause GF. 1934. *The Struggle for Existence*. Williams and Wilkins, Baltimore.
- 455 Goldyn B, Hromada M, Surmacki A, Tryjanowski P. 2003. Habitat use and diet of the red fox *Vulpes*
- 456           *vulpes* in an agricultural landscape in Poland. *Zeitschrift für Jagdwissenschaften* **49**:191–200.
- 457           doi:10.1007/BF02189737
- 458 Gong M, Hu J. 2003. The Summer Microhabitat Selection of Tibetan Fox in the Northwest Plateau of
- 459           Sichuan. *Acta Theriologica Sinica* **23**:266–269.
- 460 Greenspan E, Giordano AJ. 2021. A rangewide distribution model for the Pallas’s cat (*Otocolobus manul*):
- 461           identifying potential new survey regions for an understudied small cat. *Mammalia* **85**:574–587.

- 462 doi:10.1515/mammalia-2020-0094
- 463 Hacker C, Cong W, Xue Y, Li J, Zhang Yu, Wu L, Ji Y, Dai Y, Li Y, Jin L, Li D, Janecka J, Zhang  
464 Yuguang. 2022. Dietary diversity and niche-partitioning of carnivores across the  
465 Qinghai-Tibetan Plateau of China using DNA metabarcoding. *Journal of Mammalogy*  
466 **103**:1005–1018. doi:<https://doi.org/10.1093/jmammal/gyac044>
- 467 Hacker C, Jevit M, Hussain S, Muhammad G, Munkhtsog Bariushaa, Munkhtsog Bayaraa, Zhang Y, Li D,  
468 Liu Y, Farrington J, Balbakova F, Alamanov A, Kurmanaliev O, Buyanaa C, Bayandonoi G,  
469 Ochirjav M, Liang X, Bian X, Weckworth B, Janecka J. 2021. Regional comparison of snow  
470 leopard (*panthera uncia*) diet using dna metabarcoding. *Biodiversity and Conservation*  
471 **30**:797–817. doi:10.1007/s10531-021-02118-6
- 472 Hardin G. 1960. The Competitive Exclusion Principle. *Science* **131**:1292–1297.
- 473 Harris R, Jiak Z, Ji Y, Zhang K, Chunyan Y, Yu D. 2014. Evidence that the Tibetan fox is an obligate  
474 predator of the plateau pika: Conservation implications. *Journal of Mammalogy* **95**:0–0.  
475 doi:10.1644/14-MAMM-A-021
- 476 Haswell P, Jones K, Kusak J, Hayward M. 2018. Fear, foraging and olfaction: how mesopredators avoid  
477 costly interactions with apex predators. *Oecologia* **187**:573–583.  
478 doi:10.1007/s00442-018-4133-3
- 479 Janecka J, Jackson R, Yuquang Z, Li D, Munkhtsog B, Buckley-Beason V, Murphy W. 2008. Population  
480 monitoring of snow leopards using noninvasive collection of scat samples: A pilot study. *Animal*  
481 *Conservation* **11**:401–411. doi:10.1111/j.1469-1795.2008.00195.x
- 482 Kartzinel TR, Chen PA, Coverdale TC, Erickson DL, Kress WJ, Kuzmina ML, Rubenstein DI, Wang W,  
483 Pringle RM. 2015. DNA metabarcoding illuminates dietary niche partitioning by African large  
484 herbivores. *Proc Natl Acad Sci U S A* **112**:8019–8024. doi:10.1073/pnas.1503283112
- 485 Krofel M, Huber D, Kos I. 2011. Diet of Eurasian lynx *Lynx lynx* in the northern Dinaric Mountains  
486 (Slovenia and Croatia). *Acta Theriologica* **56**:315–322. doi:10.1007/s13364-011-0032-2
- 487 Lanszki J, Heltai M, Kövér G, Zalewski A. 2019. Non-linear relationship between body size of terrestrial  
488 carnivores and their trophic niche breadth and overlap. *Basic and Applied Ecology* **38**.  
489 doi:10.1016/j.baae.2019.06.004
- 490 Li J, Li D, Hacker C, Dong W, Wu B, Xue Y. 2022a. Spatial co-occurrence and temporal activity patterns  
491 of sympatric mesocarnivores guild in Qinling Mountains. *Global Ecology and Conservation*  
492 **36**:e02129. doi:10.1016/j.gecco.2022.e02129
- 493 Li J, Xue Y, Hacker CE, Zhang Yu, Li Y, Cong W, Jin L, Li G, Wu B, Li D, Zhang Yuguang. 2021.  
494 Projected impacts of climate change on snow leopard habitat in Qinghai Province, China. *Ecol*  
495 *Evol* **11**:17202–17218. doi:10.1002/ece3.8358
- 496 Li J, Xue Y, Liao M, Dong W, Wu B, Li D. 2022b. Temporal and Spatial Activity Patterns of Sympatric  
497 Wild Ungulates in Qinling Mountains, China. *Animals* **12**:1666. doi:10.3390/ani12131666
- 498 Li J, Xue Y, Zhang Y, Dong W, Li D. 2020. Spatial and temporal activity patterns of Golden takin  
499 (*Budorcas taxicolor bedfordi*) recorded by camera trapping. *PeerJ* **8**:e10353.  
500 doi:10.7717/peerj.10353
- 501 Li Z, Wang B, Smith J, Feng R, Feng L, Mou P, Ge J. 2019. Coexistence of two sympatric flagship  
502 carnivores in the human-dominated forest landscapes of Northeast Asia. *Landscape Ecology*  
503 **34**:291–305. doi:10.1007/s10980-018-0759-0



- 504 Liu S, Jinzhe Q, Gu J, Long Z, Ma J, Jiang G. 2021. What factors relate with the activity synchronization  
505 intensity among big cats and their ungulate prey in Northeast China? *Global Ecology and*  
506 *Conservation* **32**:e01899. doi:10.1016/j.gecco.2021.e01899
- 507 Lonsinger RC, Gese EM, Bailey LL, Waits LP. 2017. The roles of habitat and intraguild predation by  
508 coyotes on the spatial dynamics of kit foxes. *Ecosphere* **8**:e01749.  
509 doi:<https://doi.org/10.1002/ecs2.1749>
- 510 Ma D, Sun Z, Hu D, An B, Chen L, Zhang D, Dong K, Zhang L. 2021. Camera-trapping survey of the  
511 mammal diversity in the Qilian Mountains National Nature Reserve, Gansu Province. *ACTA*  
512 *Theriologica Sinica* **41**:90–98. doi:10.16829/j.slx.150418
- 513 Manlick PJ, Pauli JN. 2020. Human disturbance increases trophic niche overlap in terrestrial carnivore  
514 communities. *Proc Natl Acad Sci U S A* **117**:26842–26848. doi:10.1073/pnas.2012774117
- 515 Marneweck C, Marneweck DG, van Schalkwyk OL, Beverley G, Davies-Mostert HT, Parker DM. 2019.  
516 Spatial partitioning by a subordinate carnivore is mediated by conspecific overlap. *Oecologia*  
517 **191**:531–540. doi:10.1007/s00442-019-04512-y
- 518 Mengüllüoğlu D, Ambarlı H, Berger A, Hofer H. 2018. Foraging ecology of Eurasian lynx populations in  
519 southwest Asia: Conservation implications for a diet specialist. *Ecology and Evolution*  
520 **8**:9451–9463. doi:10.1002/ece3.4439
- 521 Molinari-Jobin A, Zimmermann F, Ryser A, Breitenmoser C, Capt S, Breitenmoser U, Molinari P, Haller  
522 H, Eyholzer R. 2007. Variation in diet, prey selectivity and home-range size of Eurasian lynx  
523 *Lynx lynx* in Switzerland. *Wildlife Biology* **13**:393–405.  
524 doi:10.2981/0909-6396(2007)13[393:VIDPSA]2.0.CO;2
- 525 Monterroso P, Díaz-Ruiz F, Lukacs PM, Alves PC, Ferreras P. 2020. Ecological traits and the spatial  
526 structure of competitive coexistence among carnivores. *Ecology* **101**:e03059.  
527 doi:10.1002/ecy.3059
- 528 Moreno-Sosa AM, Yacelga M, Craighead KA, Kramer-Schadt S, Abrams JF. 2022. Can prey occupancy  
529 act as a surrogate for mesopredator occupancy? A case study of ocelot (*Leopardus pardalis*).  
530 *Mamm Biol* **102**:163–175. doi:10.1007/s42991-022-00232-8
- 531 Newmaster SG, Thompson ID, Steeves RAD, Rodgers AR, Fazekas AJ, Maloles JR, McMullin RT,  
532 Fryxell JM. 2013. Examination of two new technologies to assess the diet of woodland caribou:  
533 video recorders attached to collars and DNA barcoding. *Can J For Res* **43**:897–900.  
534 doi:10.1139/cjfr-2013-0108
- 535 Newsome TM, Greenville AC, Ćirović D, Dickman CR, Johnson CN, Krofel M, Letnic M, Ripple WJ,  
536 Ritchie EG, Stoyanov S, Wirsing AJ. 2017. Top predators constrain mesopredator distributions.  
537 *Nat Commun* **8**:15469. doi:10.1038/ncomms15469
- 538 Odden J, Linnell J, Andersen R. 2006. Diet of Eurasian lynx, *Lynx lynx*, in the boreal forest of  
539 southeastern Norway: The relative importance of livestock and hares at low roe deer density.  
540 *European Journal of Wildlife Research* **52**:237–244. doi:10.1007/s10344-006-0052-4
- 541 Oksanen J, Blanchet FG, Friendly M, Kindt R, Legendre P, McGlenn D, Minchin PR, O'Hara RB,  
542 Simpson GL, Solymos P, Stevens MHH, Szoecs E, Wagner H. 2019. vegan: Community Ecology  
543 Package.
- 544 Pandolfi M, Forconi P, Montecchiari L. 1997. Spatial behaviour of the red fox (*Vulpes vulpes*) in a rural  
545 area of central Italy. *Italian Journal of Zoology* **64**:351–358. doi:10.1080/11250009709356222



- 546 Pokheral C, Wegge P. 2018. Coexisting Large Carnivores: Spatial Relationships of Tigers and Leopards  
547 and their Prey in a Prey-Rich Area in Lowland Nepal. *Écoscience* **26**:1–9.  
548 doi:10.1080/11956860.2018.1491512
- 549 Qi J, Holyoak M, Dobbins M, Huang C, Li Q, Wen S, Ning Y, Sun Q, Jiang G, Wang X. 2021. Wavelet  
550 methods reveal big cat activity patterns and synchrony of activity with prey. *Integrative zoology*  
551 **17**:246–260. doi:10.1111/1749-4877.12526
- 552 Reshamwala H, Raina P, Hussain Z, Khan S, Dirzo R, Habib B. 2022. On the move: spatial ecology and  
553 habitat use of red fox in the Trans-Himalayan cold desert. *PeerJ* **10**:e13967.  
554 doi:10.7717/peerj.13967
- 555 Riaz T, Shehzad W, Viari A, Pompanon F, Taberlet P, Coissac É. 2011. EcoPrimers: Inference of new  
556 DNA barcode markers from whole genome sequence analysis. *Nucleic acids research* **39**:e145.  
557 doi:10.1093/nar/gkr732
- 558 Ridout M, Linkie M. 2009. Estimating overlap of daily activity patterns from camera trap data. *Journal of*  
559 *Agricultural, Biological, and Environmental Statistics* **14**:322–337.  
560 doi:10.1198/jabes.2009.08038
- 561 Ripple WJ, Estes JA, Beschta RL, Wilmers CC, Ritchie EG, Hebblewhite M, Berger J, Elmhagen B,  
562 Letnic M, Nelson MP, Schmitz OJ, Smith DW, Wallach AD, Wirsing AJ. 2014. Status and  
563 ecological effects of the world’s largest carnivores. *Science* **343**:1241484.  
564 doi:10.1126/science.1241484
- 565 Ritchie EG, Johnson CN. 2009. Predator interactions, mesopredator release and biodiversity conservation.  
566 *Ecol Lett* **12**:982–998. doi:10.1111/j.1461-0248.2009.01347.x
- 567 Ross S. 2009. Providing an ecological basis for the conservation of the Pallas’s cat (*Otocolobus manul*).  
568 PhD thesis, University of Bristol, UK. doi:10.13140/RG.2.1.4338.1521
- 569 Ross S, Barashkova A, Kirilyuk V, Naidenko S. 2019. The behaviour and ecology of the manul.
- 570 Rowcliffe M, Kays R, Kranstauber B, Carbone C, Jansen P. 2014. Quantifying levels of animal activity  
571 using camera-trap data. *Methods in Ecology and Evolution* **5**. doi:10.1111/2041-210X.12278
- 572 Schoener TW. 1974. Resource Partitioning in Ecological Communities. *Science*.
- 573 Sévêque A, Gentle LK, López-Bao JV, Yarnell RW, Uzal A. 2020. Human disturbance has contrasting  
574 effects on niche partitioning within carnivore communities. *Biol Rev Camb Philos Soc*  
575 **95**:1689–1705. doi:10.1111/brv.12635
- 576 Shannon CE, Weaver W. 1949. The Mathematical Theory of Communication. *Philosophical Review* **60**.
- 577 Shao X, Lu Q, Xiong M, Bu H, Shi X, Wang D, Zhao J, Li S, Yao M. 2021. Prey partitioning and  
578 livestock consumption in the world’s richest large carnivore assemblage. *Curr Biol*  
579 **31**:4887–4897.e5. doi:10.1016/j.cub.2021.08.067
- 580 Shrotriya S, Reshamwala H, Lyngdoh S, Jhala Y, Habib B. 2022. Feeding Patterns of Three Widespread  
581 Carnivores—The Wolf, Snow Leopard, and Red Fox—in the Trans-Himalayan Landscape of  
582 India. *Frontiers in Ecology and Evolution* **10**:815996. doi:10.3389/fevo.2022.815996
- 583 Smith A, Foggin M. 1999. The plateau pika (*Ochotona curzoniae*) is a keystone species for biodiversity  
584 on the Tibetan plateau. *Animal Conservation* **2**:235–240. doi:10.1017/S1367943099000566
- 585 Sorensen TJ. 1948. A method of establishing groups of equal amplitude in plant sociology based on  
586 similarity of species content and its application to analyses of the vegetation on Danish commons.  
587 Kobenhavn,: Ejnar Minksgaard,.

- 588 Steinmetz R, Seuaturien N, Intanajitjuy P, Inrueang P, Prempre K. 2021. The effects of prey depletion on  
589 dietary niches of sympatric apex predators in Southeast Asia. *Integr Zool* **16**:19–32.  
590 doi:10.1111/1749-4877.12461
- 591 Torretta E, Riboldi L, Costa E, Delfoco C, Frignani E, Alberto M. 2021. Niche partitioning between  
592 sympatric wild canids: the case of the golden jackal (*Canis aureus*) and the red fox (*Vulpes*  
593 *vulpes*) in north-eastern Italy. *BMC Ecology and Evolution* **21**:129.  
594 doi:10.1186/s12862-021-01860-3
- 595 van der Vinne V, Tachinardi P, Riede SJ, Akkerman J, Scheepe J, Daan S, Hut RA. 2019. Maximising  
596 survival by shifting the daily timing of activity. *Ecol Lett* **22**:2097–2102. doi:10.1111/ele.13404
- 597 Vilella M, Ferrandiz-Rovira M, Sayol F. 2020. Coexistence of predators in time: Effects of season and  
598 prey availability on species activity within a Mediterranean carnivore guild. *Ecol Evol*  
599 **10**:11408–11422. doi:https://doi.org/10.1002/ece3.6778
- 600 Wang D, Sai Q, Wang Z, Zhao H, Lian X. 2022. Spatiotemporal overlap among sympatric Pallas's cat  
601 (*Otocolobus manul*), Tibetan fox (*Vulpes ferrilata*) and red fox (*V. vulpes*) in the source region of  
602 the Yangtze River. *Biodiv Sci* **30**:21365. doi:10.17520/biods.2021365
- 603 Wang J, Laguardia A, Damerell PJ, Riordan P, Shi K. 2014. Dietary overlap of snow leopard and other  
604 carnivores in the Pamirs of Northwestern China. *Chin Sci Bull* **59**:3162–3168.  
605 doi:10.1007/s11434-014-0370-y
- 606 Xue Y, Li J, Hu Y, Ma L, Qian W, Yan P, Yang M, Chen D, Wu B, Li D. 2019. Camera-trapping survey of  
607 the mammals and birds in the Qilian Mountain National Park (Qinghai area), China. *ACTA*  
608 *Theriological Sinica* **39**:466–475. doi:10.16829/j.slxb.150307
- 609 Zhang J. 2016. spaa: SPecies Association Analysis.
- 610 Zheng J. 2011. The study of Qinghai nature reserve. Qinghai People's Publishing House.
- 611

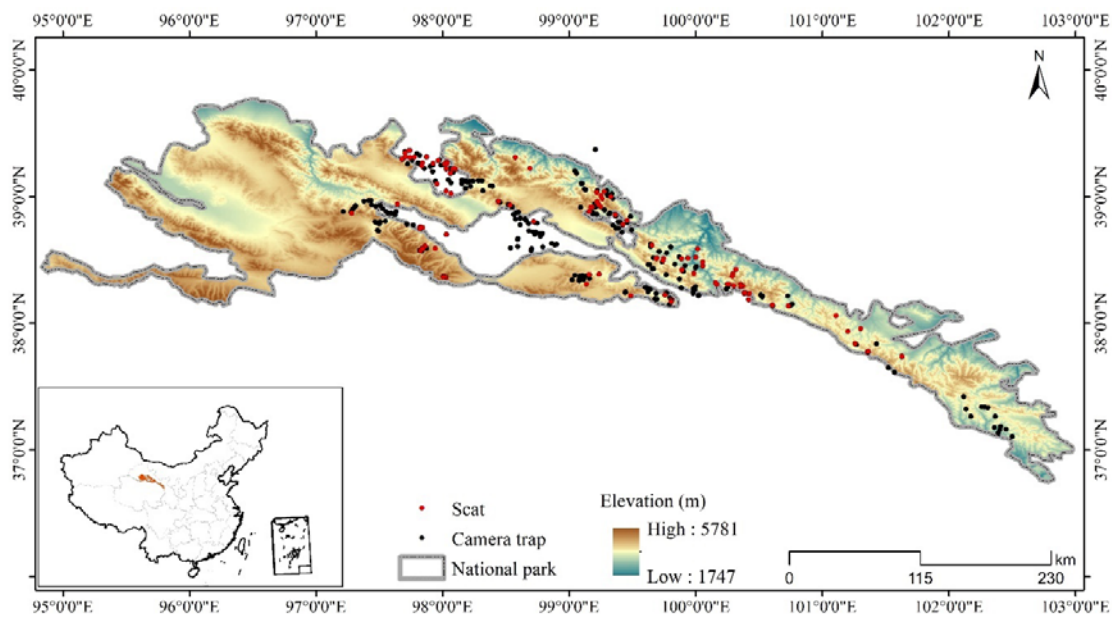

612

613 **Figure 1** Locations of camera trap stations and scat collection sites in this study.

614

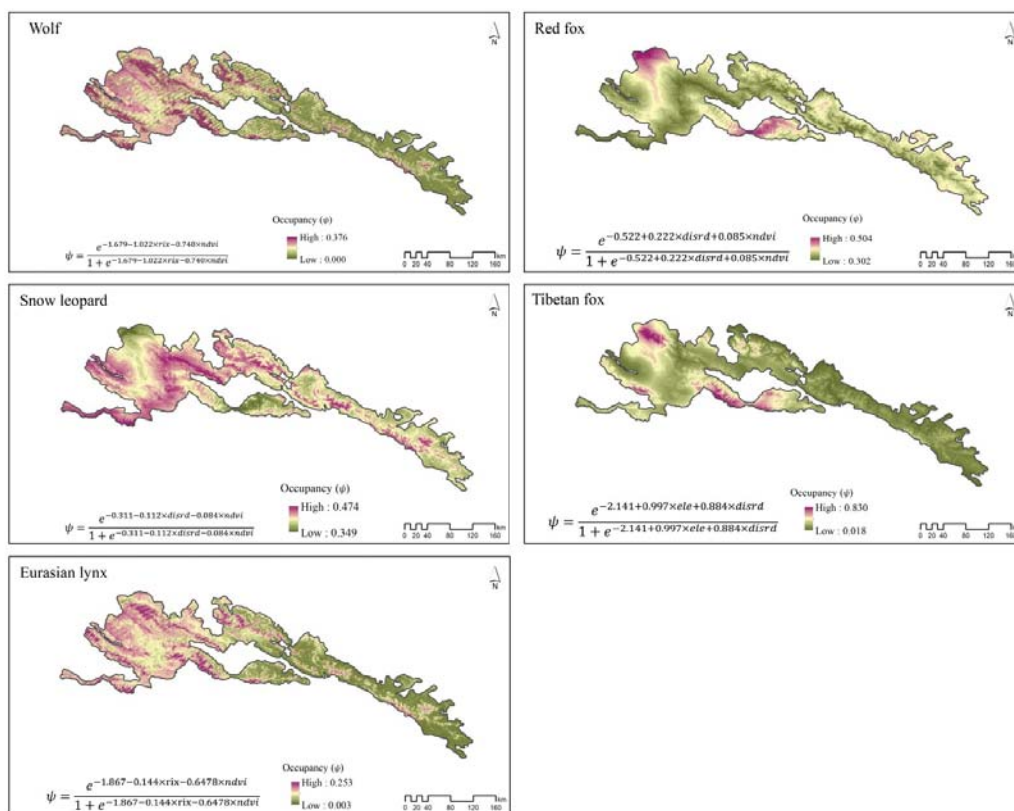

615

616 **Figure 2** Spatial projection of carnivore species occupancy probability ( $\psi$ ) based on the average optimal

617 models ( $\Delta AIC \leq 2$ ).

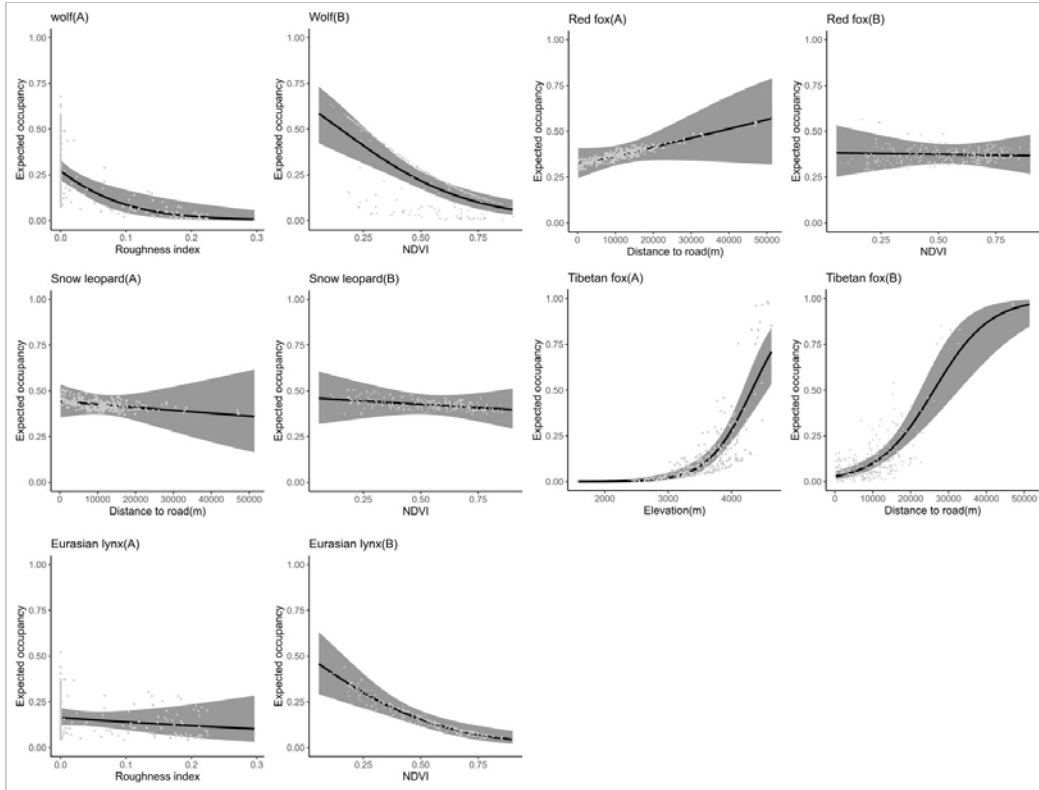

618

619 **Figure 3** The relationship between carnivore species occupancy probability and covariates by the optimal

620 models ( $\Delta AIC \leq 2$ ). Solid line represents the fitted with polynomial regression, gray area represents 95%

621 confidence intervals.

622

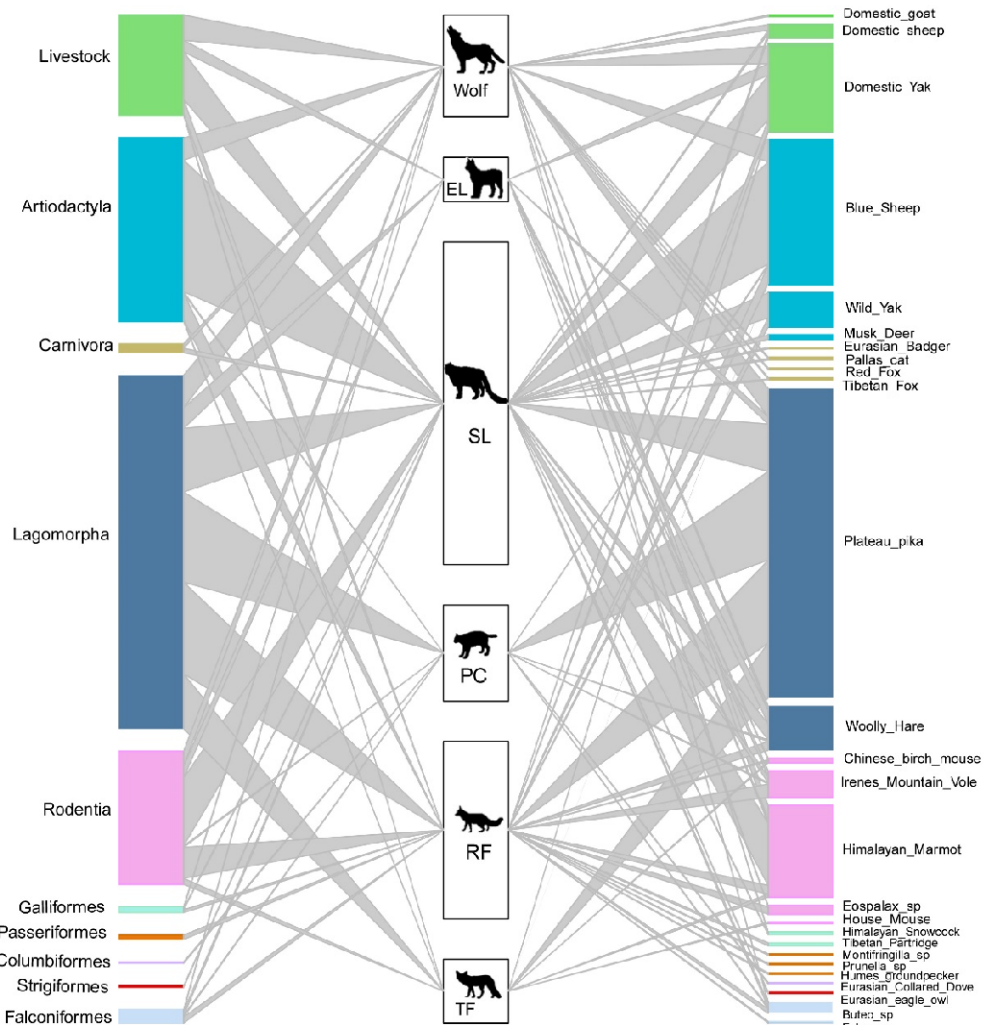

623

624

625

626

627

628

629

630

**Figure 4** The food web of carnivore species (SL-snow leopard, EL-Eurasian lynx, PC-Pallas's cat, RF-red fox, TF-Tibetan fox). The widths of the upper bars represent the frequency of occurrence of prey species in scats, the widths of the middle bars represent the number of samples for each carnivore, and the widths of the lower bars represent the taxonomic order of prey species. The colors of prey match the taxonomic orders. The connecting line widths represent the prey frequency of occurrence in the diet of each carnivore species.



631 **Table 1** Summary of occupancy rate and detection probability of different species for the optimal models  
 632 ( $\Delta AIC \leq 2$ ).

| Species              | Models                                       | Number of parameters | AIC    | $\Delta AIC$ | AIC <sub>wi</sub> | R <sup>2</sup> | $\psi$       | <i>Pr</i>    |
|----------------------|----------------------------------------------|----------------------|--------|--------------|-------------------|----------------|--------------|--------------|
| Wolf                 | <i>Psi</i> (rix+ndvi); <i>P</i> (ele)        | 5                    | 284.75 | 0.000        | 0.490             | 0.150          | 0.211        | 0.120        |
|                      | <i>Psi</i> (rix+ndvi); <i>P</i> (ele+prey)   | 6                    | 286.58 | 1.830        | 0.190             | 0.151          | 0.219        | 0.115        |
|                      | <b>Model average</b>                         |                      |        |              |                   |                | <b>0.215</b> | <b>0.117</b> |
| Snow leopard         | <i>Psi</i> (disrd+ndvi); <i>P</i> (ele)      | 5                    | 982.41 | 0.000        | 0.080             | 0.027          | 0.425        | 0.423        |
|                      | <i>Psi</i> (.); <i>P</i> (ele)               | 3                    | 982.68 | 0.270        | 0.070             | 0.013          | 0.428        | 0.422        |
|                      | <i>Psi</i> (disrd); <i>P</i> (ele)           | 4                    | 983.14 | 0.730        | 0.056             | 0.018          | 0.428        | 0.420        |
|                      | <i>Psi</i> (ndvi); <i>P</i> (ele)            | 4                    | 983.35 | 0.940        | 0.050             | 0.017          | 0.425        | 0.424        |
|                      | <i>Psi</i> (ele+disrd); <i>P</i> (ele)       | 5                    | 983.67 | 1.260        | 0.043             | 0.023          | 0.419        | 0.427        |
|                      | <i>Psi</i> (disrd+ndvi); <i>P</i> (.)        | 4                    | 983.69 | 1.280        | 0.042             | 0.016          | 0.418        | 0.437        |
|                      | <i>Psi</i> (ele+disrd); <i>P</i> (.)         | 4                    | 983.84 | 1.430        | 0.039             | 0.016          | 0.414        | 0.438        |
|                      | <i>Psi</i> (ele); <i>P</i> (ele)             | 4                    | 984.06 | 1.640        | 0.035             | 0.015          | 0.422        | 0.427        |
|                      | <i>Psi</i> (ele); <i>P</i> (.)               | 3                    | 984.11 | 1.700        | 0.034             | 0.008          | 0.417        | 0.437        |
|                      | <i>Psi</i> (disrd+ndvi); <i>P</i> (ele+prey) | 6                    | 984.12 | 1.710        | 0.034             | 0.028          | 0.428        | 0.420        |
|                      | <i>Psi</i> (ndvi); <i>P</i> (.)              | 3                    | 984.13 | 1.720        | 0.034             | 0.008          | 0.420        | 0.436        |
|                      | <i>Psi</i> (rix); <i>P</i> (ele)             | 4                    | 984.22 | 1.810        | 0.033             | 0.014          | 0.428        | 0.421        |
|                      | <i>Psi</i> (.); <i>P</i> (.)                 | 2                    | 984.33 | 1.920        | 0.031             | 0.000          | 0.418        | 0.437        |
|                      | <i>Psi</i> (disrd); <i>P</i> (ele+prey)      | 5                    | 984.35 | 1.940        | 0.030             | 0.021          | 0.433        | 0.417        |
| <b>Model average</b> |                                              |                      |        |              |                   | <b>0.423</b>   | <b>0.428</b> |              |
| Eurasian lynx        | <i>Psi</i> (rix+ndvi); <i>P</i> (prey)       | 5                    | 374.11 | 0.000        | 0.122             | 0.081          | 0.157        | 0.321        |
|                      | <i>Psi</i> (rix+ndvi); <i>P</i> (.)          | 4                    | 374.31 | 0.200        | 0.110             | 0.071          | 0.151        | 0.348        |
|                      | <i>Psi</i> (ndvi); <i>P</i> (prey)           | 4                    | 374.33 | 0.220        | 0.109             | 0.071          | 0.159        | 0.318        |
|                      | <i>Psi</i> (ndvi); <i>P</i> (.)              | 3                    | 374.68 | 0.570        | 0.092             | 0.060          | 0.152        | 0.348        |
|                      | <i>Psi</i> (disrd+ndvi); <i>P</i> (.)        | 4                    | 374.95 | 0.840        | 0.080             | 0.068          | 0.153        | 0.347        |
|                      | <i>Psi</i> (disrd_ndvi); <i>P</i> (prey)     | 5                    | 374.96 | 0.860        | 0.079             | 0.077          | 0.158        | 0.322        |
|                      | <i>Psi</i> (rix+ndvi); <i>P</i> (ele)        | 5                    | 375.88 | 1.770        | 0.050             | 0.073          | 0.151        | 0.359        |
|                      | <i>Psi</i> (rix+ndvi); <i>P</i> (ele+prey)   | 6                    | 375.88 | 1.780        | 0.050             | 0.082          | 0.156        | 0.329        |
|                      | <i>Psi</i> (disrd+ndvi); <i>P</i> (ele)      | 5                    | 376.04 | 1.930        | 0.046             | 0.072          | 0.155        | 0.359        |
|                      | <i>Psi</i> (ndvi); <i>P</i> (ele+prey)       | 5                    | 376.07 | 1.970        | 0.046             | 0.072          | 0.158        | 0.327        |
| <b>Model average</b> |                                              |                      |        |              |                   | <b>0.155</b>   | <b>0.338</b> |              |
| Red fox              | <i>Psi</i> (disrd+ndvi); <i>P</i> (ele)      | 5                    | 910.36 | 0.000        | 0.066             | 0.028          | 0.373        | 0.395        |
|                      | <i>Psi</i> (disrd+ndvi); <i>P</i> (.)        | 4                    | 910.94 | 0.580        | 0.049             | 0.019          | 0.369        | 0.403        |
|                      | <i>Psi</i> (disrd); <i>P</i> (ele)           | 4                    | 910.94 | 0.580        | 0.049             | 0.019          | 0.373        | 0.396        |
|                      | <i>Psi</i> (disrd+ndvi); <i>P</i> (prey)     | 5                    | 911.02 | 0.660        | 0.047             | 0.025          | 0.377        | 0.387        |
|                      | <i>Psi</i> (disrd+ndvi); <i>P</i> (ele+prey) | 6                    | 911.20 | 0.840        | 0.043             | 0.032          | 0.379        | 0.384        |
|                      | <i>Psi</i> (disrd); <i>P</i> (.)             | 3                    | 911.26 | 0.900        | 0.042             | 0.011          | 0.370        | 0.402        |

|             |                                             |   |        |       |       |       |              |              |
|-------------|---------------------------------------------|---|--------|-------|-------|-------|--------------|--------------|
|             | <i>Psi</i> (disrd); <i>P</i> (prey)         | 4 | 911.32 | 0.950 | 0.041 | 0.017 | 0.377        | 0.386        |
|             | <i>Psi</i> (.); <i>P</i> (ele)              | 3 | 911.56 | 1.200 | 0.036 | 0.010 | 0.373        | 0.395        |
|             | <i>Psi</i> (disrd); <i>P</i> (ele+prey)     | 5 | 911.74 | 1.380 | 0.033 | 0.023 | 0.379        | 0.384        |
|             | <i>Psi</i> (disrd+r1x); <i>P</i> (ele)      | 5 | 911.75 | 1.390 | 0.033 | 0.023 | 0.374        | 0.395        |
|             | <i>Psi</i> (disrd+r1x); <i>P</i> (.)        | 4 | 912.05 | 1.690 | 0.028 | 0.015 | 0.371        | 0.402        |
|             | <i>Psi</i> (disrd+r1x); <i>P</i> (prey)     | 5 | 912.08 | 1.720 | 0.028 | 0.022 | 0.379        | 0.386        |
|             | <i>Psi</i> (.); <i>P</i> (prey)             | 3 | 912.22 | 1.860 | 0.026 | 0.007 | 0.376        | 0.386        |
|             | <i>Psi</i> (.); <i>P</i> (.)                | 2 | 912.27 | 1.910 | 0.025 | 0.000 | 0.368        | 0.402        |
|             | <b>Model average</b>                        |   |        |       |       |       | <b>0.374</b> | <b>0.393</b> |
| Tibetan fox | <i>Psi</i> (ele+disrd); <i>P</i> (ele+prey) | 6 | 328.13 | 0.000 | 0.560 | 0.361 | 0.159        | 0.219        |
|             | <b>Model average</b>                        |   |        |       |       |       | <b>0.159</b> | <b>0.219</b> |

633

634 **Table 2** Covariates influencing carnivores occupancy rate and detection probability based on the optimal  
 635 models ( $\Delta AIC \leq 2$ ). Abbreviations: Ele-elevation, Disrd-distance to roads, NDVI-normalized difference  
 636 vegetation index, Tpop-people population density.

| Species       | Model component | Covariates | Estimate ( $\beta$ ) | SE    | Z      | P         |
|---------------|-----------------|------------|----------------------|-------|--------|-----------|
| Wolf          | Occupancy       | Intercept  | -1.679               | 0.459 | 3.656  | <0.001*** |
|               |                 | Rix        | -1.022               | 0.500 | 2.043  | 0.041*    |
|               |                 | Ndvi       | -0.740               | 0.294 | 2.516  | 0.012*    |
|               | Detection       | Intercept  | -2.183               | 0.430 | 5.082  | <0.001*** |
|               |                 | Ele        | 0.700                | 0.252 | 2.783  | 0.005**   |
|               |                 |            |                      |       |        |           |
| Snow leopard  | Occupancy       | Intercept  | -0.311               | 0.141 | 2.203  | 0.028*    |
|               |                 | Disrd      | -0.112               | 0.150 | 0.746  | 0.456     |
|               |                 | Ndvi       | -0.084               | 0.139 | 0.604  | 0.546     |
|               | Detection       | Intercept  | -0.299               | 0.119 | 2.518  | 0.012*    |
|               |                 | Ele        | 0.177                | 0.167 | 1.058  | 0.290     |
|               |                 |            |                      |       |        |           |
| Eurasian lynx | Occupancy       | Intercept  | -1.867               | 0.232 | 8.029  | <0.001*** |
|               |                 | Rix        | -0.144               | 0.233 | 0.619  | 0.536     |
|               |                 | Ndvi       | -0.647               | 0.199 | 3.246  | 0.001**   |
|               | Detection       | Intercept  | -0.685               | 0.256 | 2.681  | 0.007**   |
|               |                 | Prey       | 0.122                | 0.165 | 0.740  | 0.459     |
|               |                 |            |                      |       |        |           |
| Red fox       | Occupancy       | Intercept  | -0.522               | 0.148 | 3.522  | <0.001*** |
|               |                 | Disrd      | 0.222                | 0.169 | 1.315  | 0.189     |
|               |                 | Ndvi       | 0.085                | 0.144 | 0.590  | 0.555     |
|               | Detection       | Intercept  | -0.435               | 0.124 | 3.495  | <0.001*** |
|               |                 | Ele        | 0.069                | 0.100 | 0.689  | 0.491     |
|               |                 |            |                      |       |        |           |
| Tibetan fox   | Occupancy       | Intercept  | -2.141               | 0.461 | -4.650 | <0.001*** |
|               |                 | Ele        | 0.997                | 0.403 | 2.480  | 0.013*    |
|               |                 | Disrd      | 0.884                | 0.272 | 3.250  | 0.001**   |
|               | Detection       | Intercept  | -1.462               | 0.492 | -2.970 | 0.003**   |
|               |                 | Ele        | 0.742                | 0.305 | 2.440  | 0.015*    |
|               |                 | Prey       | 0.436                | 0.155 | 2.820  | 0.005**   |

637 The different superscript letters represent the significant, \*\*\*  $p < 0.001$ , \*\*  $0.001 < p < 0.01$ , \*  $0.01 < p < 0.05$ .

638 **Table 3** Spatial overlap (Sørensen's index), diel activity overlap ( $\Delta$ ) and dietary overlap (Pianka's index),  
 639 as well as confidence intervals for carnivore species.

|                              | Sørensen's index | $\Delta$            | Pianka's index      |
|------------------------------|------------------|---------------------|---------------------|
| Wolf – Snow leopard          | 0.277            | 0.676 (0.562-0.756) | 0.892 (0.804-0.982) |
| Wolf – Eurasian lynx         | 0.272            | 0.661 (0.541-0.759) | 0.585 (0.141-0.881) |
| Snow leopard – Eurasian lynx | 0.305            | 0.900 (0.854-0.992) | 0.458 (0.160-0.886) |
| Wolf – Pallas's cat          | —                | —                   | 0.658 (0.053-0.950) |
| Wolf – Red fox               | 0.365            | 0.497 (0.359-0.563) | 0.811 (0.497-0.962) |
| Wolf – Tibetan fox           | 0.350            | 0.855 (0.777-0.937) | 0.689 (0.456-0.967) |
| Snow leopard – Pallas's cat  | —                | —                   | 0.354 (0.092-0.827) |
| Snow leopard – Red fox       | 0.477            | 0.814 (0.756-0.863) | 0.586 (0.568-0.941) |
| Snow leopard – Tibetan fox   | 0.292            | 0.711 (0.629-0.744) | 0.390 (0.299-0.905) |
| Eurasian lynx – Pallas's cat | —                | —                   | 0.376 (0-0.921)     |
| Eurasian lynx – Red fox      | 0.205            | 0.800 (0.728-0.878) | 0.536 (0.442-0.910) |
| Eurasian lynx – Tibetan fox  | 0.198            | 0.695 (0.601-0.756) | 0.385 (0.078-0.919) |
| Pallas's cat – Red fox       | —                | —                   | 0.945 (0.369-0.988) |
| Pallas's cat – Tibetan fox   | —                | —                   | 0.997 (0-1)         |
| Red fox – Tibetan fox        | 0.349            | 0.576 (0.467-0.580) | 0.949 (0.279-0.988) |

640
